# Supplementary material for: A high volume sampling system for isotope determination of volatile halocarbons and hydrocarbons
Source: Copernicus journal article supplement (doi:10.5194/amt-4-2073-2011), 2011-10-04
Supplement: Supplementary file 1 [file amt-4-2073-2011-supplement.pdf]

## Supplementary Material

The supplementary material shows the IRMS-chromatograms for both fractions of a sample from the coastal site. Both the mass 45 trace and the m/z 54/46 ratios are shown. In addition the spectra of selected organohalogenes from the concurrent quadrupole-MS run are shown, which have been used to assess the peak purity.

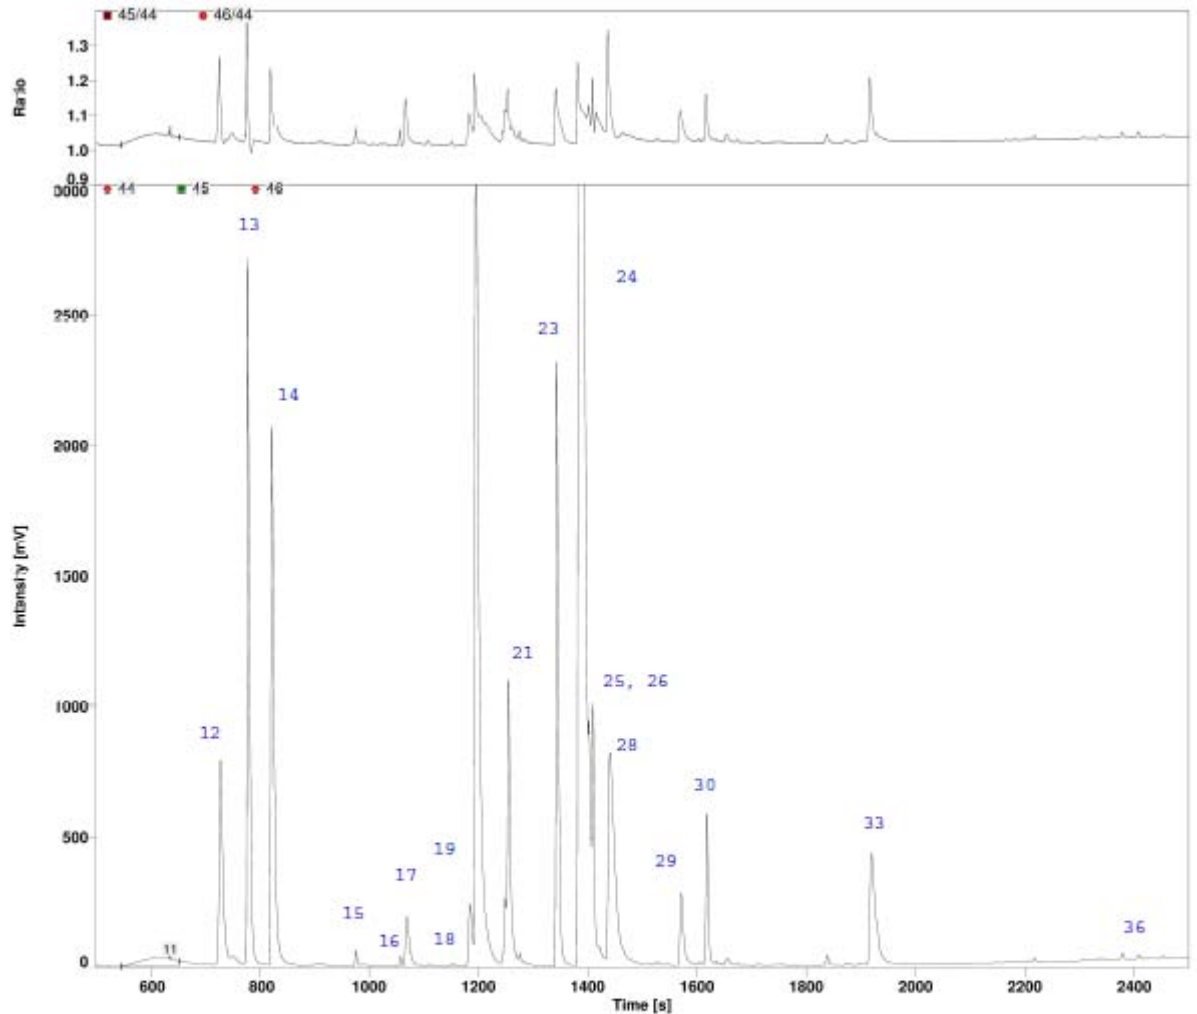

|                     |                                                    |                           |                        |
|---------------------|----------------------------------------------------|---------------------------|------------------------|
| 11 Carbonyl sulfide | 16 bromomethane                                    | 23 2-Propenal             | 29 Isopentane          |
| 12 Norflurane       | 17 1-chloro-1,1-difluoroethane                     | 24 Propanal               | 30 Pentane             |
| 13 Chloromethane    | 18 isobutane                                       | 25 dichloromethane        | 31 Cyclopentane        |
| 14 Propane          | 19 2-butene / bromochlorodifluoromethane           | 26 CS <sub>2</sub>        | 33 Carbontetrachloride |
| 15 acetaldehyde     | 21 butane / 1,2-dichloro-1,1,2,2-tetrafluoroethane | 28 trichlorofluoromethane | 36 bromoform           |

Mass 45 trace and m/z 46/45 ratio of Fraction A of a representative sample from the coastal site

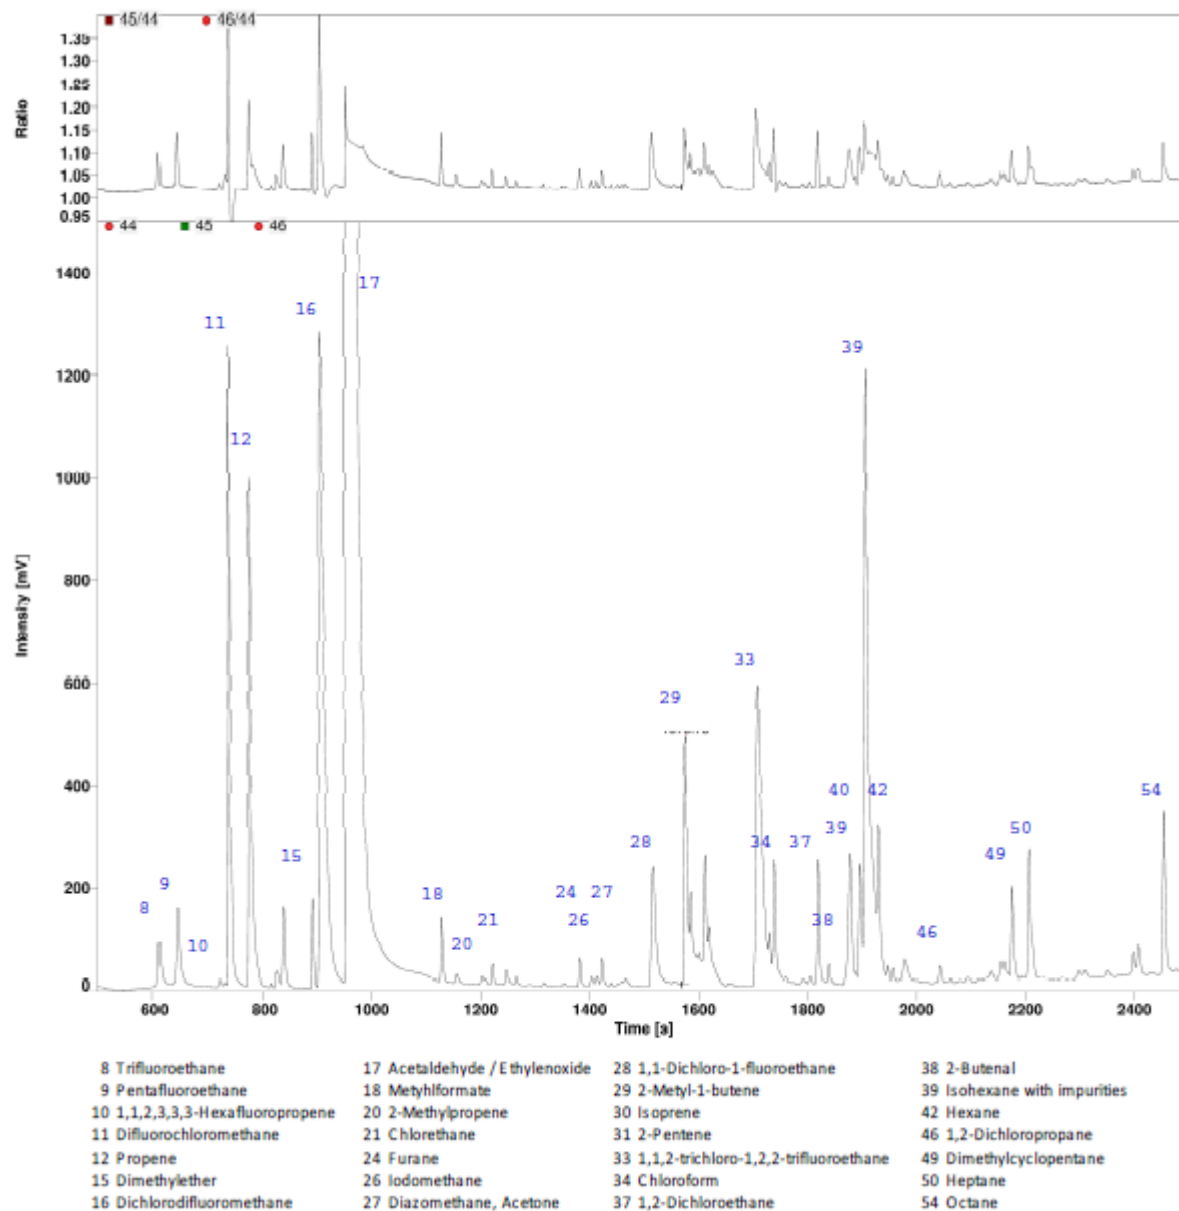

Mass 45 trace and m/z 46/45 ratio of Fraction B of a representative sample from the coastal site

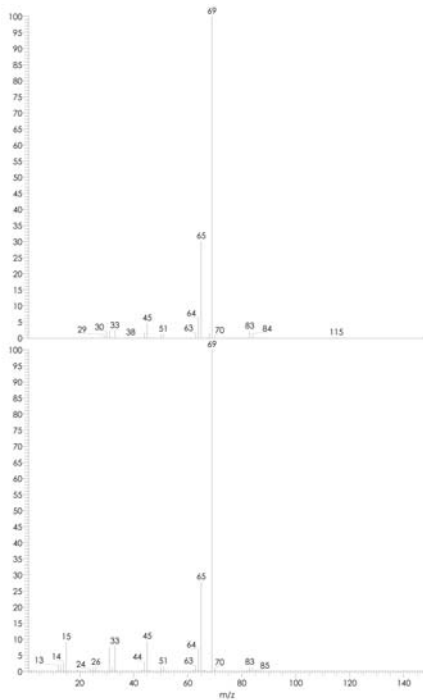

Fraction B; Trifluoroethane

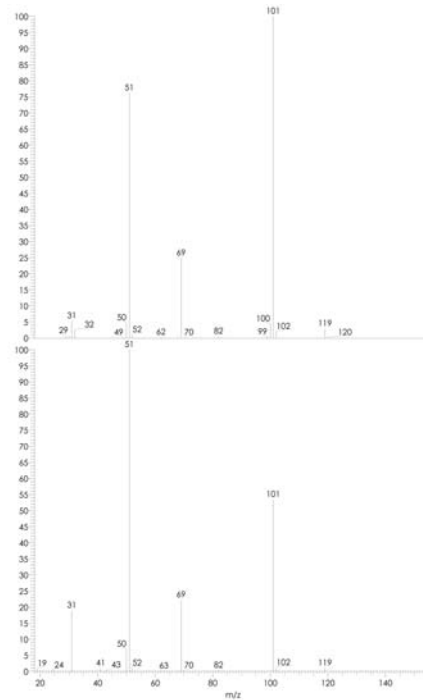

Fraction B: Pentafluoroethane

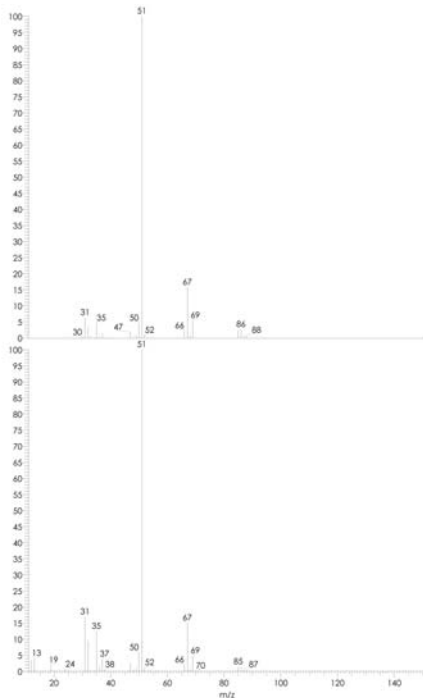

Fraction B: Chlorodifluoromethane

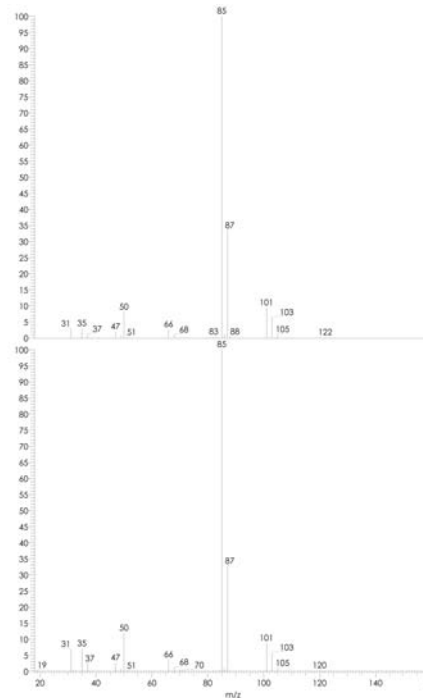

Fraction B: Dichlorodifluoromethane

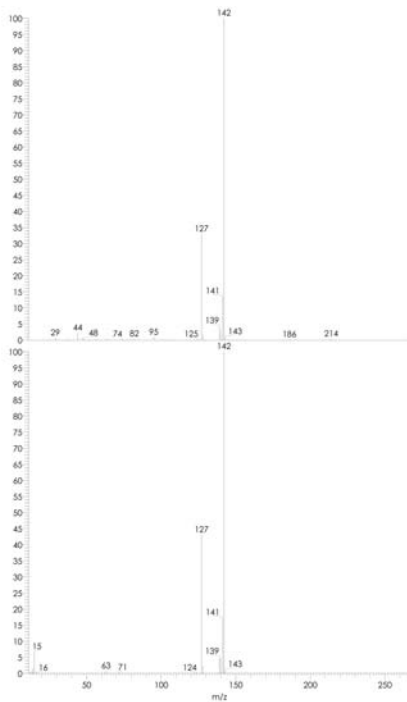

Fraction B: Iodomethane

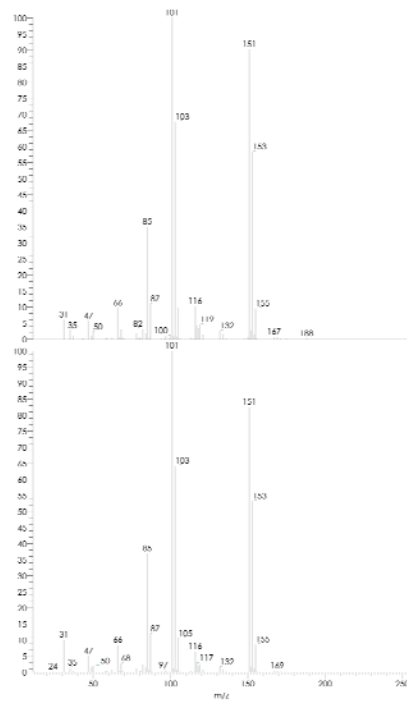

Fraction B: 1,1,2-Trichloro-1,2,2-trifluoroethane

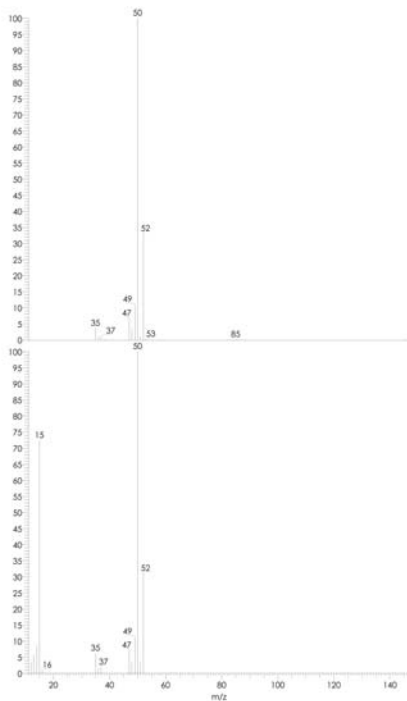

Fraction A: Chloromethane

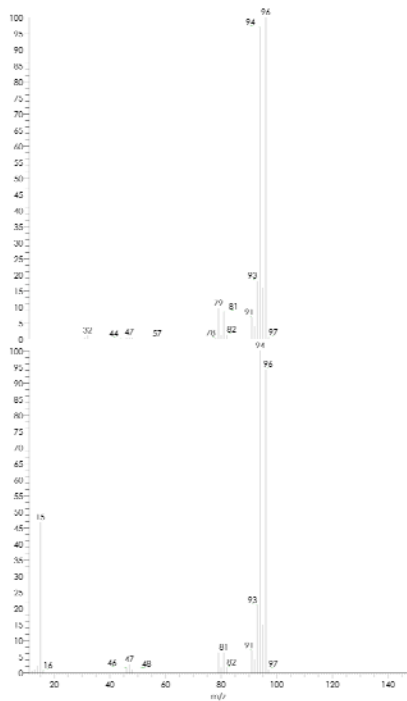

Fraction A: Bromomethane

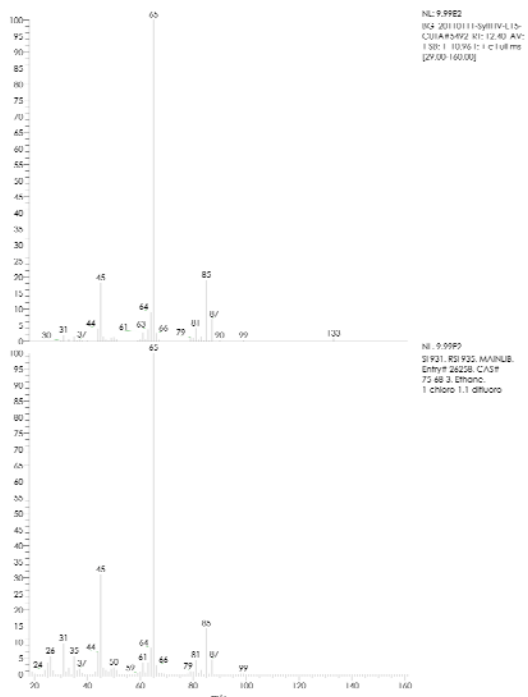

Fraction A: 1-Chloro-1,1-difluoromethane

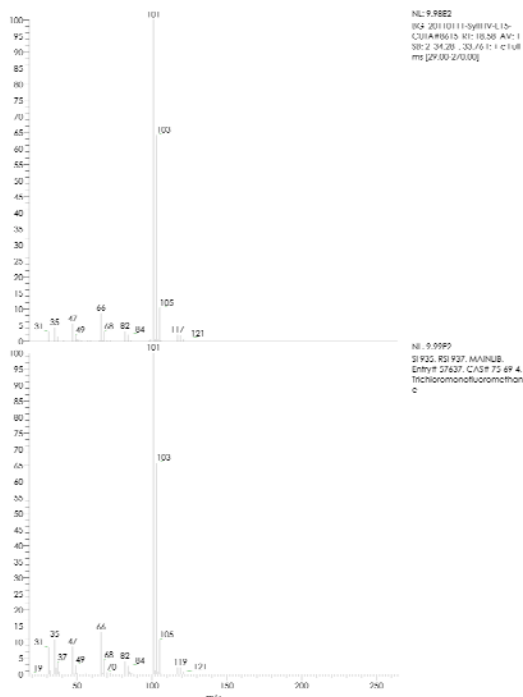

Fraction A: Trichlorofluoromethane

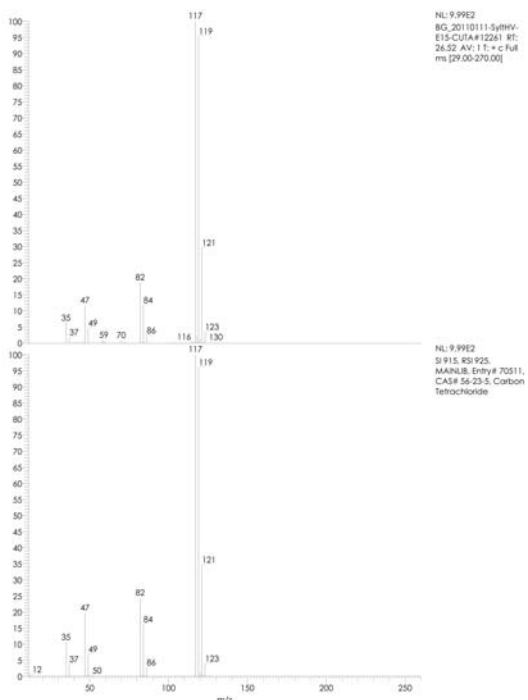

Fraction A: Tetrachloromethane

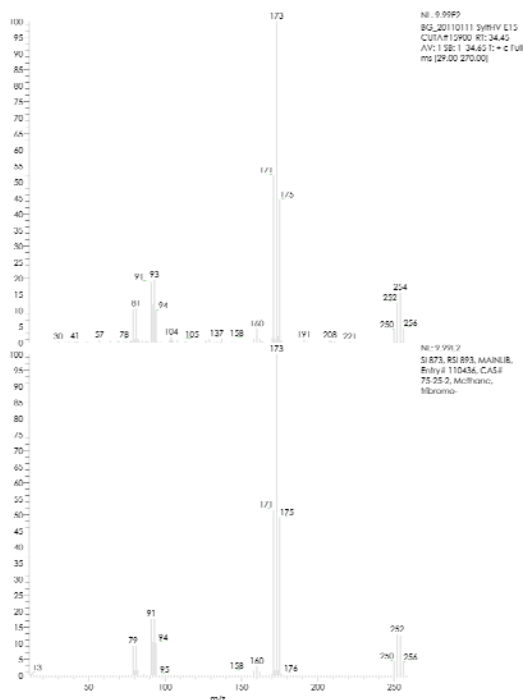

Fraction A: Bromoform
